# Supplementary material for: Genetic dissection of mutual interference between two consecutive learning tasks in Drosophila
Source: eLife. 2023 Mar 10;12:e83516. doi: 10.7554/eLife.83516 (PMC10030115; doi:10.7554/eLife.83516)
Supplement: Figure 1—figure supplement 1—source data 1. [file elife-83516-fig1-figsupp1-data1.xlsx]

## Sheet: S1A
Figure 1-figure supplement 1A left											Mean	SEM
Control	53.41	50.36	57.27	48.3	51.52	36.71	47.61	49.21			49.2987	2.10797
Backward	41.59	49.92	61.62	29.71	58.9	44.92	46.3	42.33			46.9113	3.58234
Associative	27.64	22.11	23.92	32.3	30.17	30.25	34.62	27.37			28.5475	1.47329
Figure 1-figure supplement 1A right											Mean	SEM
Control	31.08	45.3	41.05	37.77	33.95	39.21	39.65	29.58	37.15		37.1933	1.65363
Odor Alone	25.4	39.44	22.47	48.4	38.64	42.75	35.94	36.16			36.15	3.02783
Shock Alone	40.87	50.53	48.32	38.09	18.17	29.29	48.82	42.5			39.5738	3.91506

## Sheet: S1B
Figure 1-figure supplement 1B											Mean	SEM
Control	62.39	51.5	54.81	58.75	59.76	52.76	44.98	47.03			53.9975	2.17337
Associative	35.9	32.9	47.01	41.82	43	40.8	18.63	43.03			37.8863	3.16066

## Sheet: S1C
Figure 1-figure supplement 1C
CS+											Mean	SEM
Pro-I－	43.18	52.85	38.51	49.07	44.02	42.42	44.06	42.58	43.39		44.4533	1.38383
Pro-I＋	20.34	22.03	22.74	29.16	31.63	34.97	35.91	39.99	30.53	19.02	28.632	2.29604
CS-											Mean	SEM
Pro-I－	-17.65	-22.13	-25.66	-18.62	-19.64	-14.53	-26.69	-27.52			-21.555	1.66911
Pro-I＋	-26.76	-21.76	-22.46	-33.45	-28.86	-19.54	-20.27	-19.65	-19.87	-12.08	-22.47	1.87495
