# Supplementary material for: Genetic dissection of mutual interference between two consecutive learning tasks in Drosophila
Source: eLife. 2023 Mar 10;12:e83516. doi: 10.7554/eLife.83516 (PMC10030115; doi:10.7554/eLife.83516)
Supplement: Figure 1—source data 1. [file elife-83516-fig1-data1.xlsx]

## Sheet: 1A
Figure 1A
											Mean	SEM
Control	75.53	72.49	70.83	66.27	68.25	74.74	78.79	71.16			72.2575	1.43148
Odor Alone	77.08	74.09	63.09	63.28	72.54	64.38	57.33	63.81			66.95	2.39874
Shock Alone	76.95	83.36	66.43	61.88	73.48	65.41	68.44	65.03			70.1225	2.55533
Backward	74.17	72.35	61.71	59.39	74.57	72.15	76.2	67.75			69.7862	2.20734
Associative	59.14	54.26	52.94	44.48	50.64	53.21	48.68	38.91			50.2825	2.21846

## Sheet: 1B
Figure 1B
											Mean	SEM
Aversive learning （AP)	58.11	49.75	62.88	58.18	60.75	68.98	58.82	51.3			58.5963	2.16615
Proactive interference (AP→AV）	57.48	63.52	64.8	72.4	66.1	64.14	64.2	65.58			64.7775	1.43968
Appetitive learning (AV)	-31.2	-34.95	-44.22	-49.49	-40.99	-40.69	-33.66	-42.58			-39.7225	2.14852

## Sheet: 1C
Figure 1C
											Mean	SEM
Control	57.35	61.23	67.41	64.72	61.29	65.13	72.35	63.34			64.1025	1.59652
Same context	34.4	57.2	42.41	47.75	45.39	59.88	53.22	58.24			49.8113	3.14733
Different context	47.72	54.31	66.99	61.59	70.43	58.46	73	62.21			61.8387	2.96574
