# Supplementary material for: Genetic dissection of mutual interference between two consecutive learning tasks in Drosophila
Source: eLife. 2023 Mar 10;12:e83516. doi: 10.7554/eLife.83516 (PMC10030115; doi:10.7554/eLife.83516)
Supplement: Figure 2—source data 1. [file elife-83516-fig2-data1.xlsx]

## Sheet: 2B
Figure 2B
											Mean	SEM
control	81.94	78.34	75.29	67.82	81.69	79.18	74.59	60.97			74.9775	2.57109
0	50.96	56.75	42.4	42.51	52.65	37.97	35.96	70.8			48.75	4.07376
5	57.89	53.42	49.23	42.23	58.66	45.23	43.7	53.19			50.4437	2.23987
10	59.99	54.54	48.35	43.35	48.9	62.36	60.12	58.3			54.4888	2.43285
15	42.26	56.83	61.79	60.39	60.83	66.28	53.66	71.17			59.1512	3.06897
20	62.05	59.67	65.01	72.13	78.24	63.95	58.05	56.14			64.405	2.6333

## Sheet: 2C
Figure 2C
											Mean	SEM
control	62.51	55.77	54.27	57.85	69.91	73.57	72.66	75.33			65.2338	3.04768
30	76.81	37.22	38.94	53.32	78.7	71.71	65.63	68.64			61.3712	5.77521
60	66.97	64.05	46.92	49.89	73.07	78.94	66.3	54.15			62.5362	3.98722

## Sheet: 2E
Figure 2E
Retro-I -											Mean	SEM
0	76.64	59.76	76.12	78.11	56.89	55.84	74.41	73.22			68.8738	3.39175
20	42.41	57.17	59.1	79.96	48.41	33.36	37.21	38.41			49.5037	5.45237
30	43.79	67.54	52.84	57.55	46.43	38.16	48.31	52.25			50.8588	3.17983
60	44.62	37.46	49.43	40.61	22.14	42.21	35.43	35.3	35.9		38.1222	2.55225
Retro-I +											Mean	SEM
0	7.63	48.5	26.47	41.1	18.11	29.34	30.7	24.85	37.15		29.3167	4.0724
20	24.78	6.24	4.48	19.7	37.74	3.56	-1.06	48.81			18.0312	6.3817
30	34.97	14.48	-27.19	13.26	2.32	8.69	27.73	-2.12			9.0175	6.75002
60	0.37	11.25	11.95	-0.49	10.57	4.96	-5.17	-7.07			3.29625	2.65875

## Sheet: 2F
Figure 2F
														Mean	SEM
Retro-I +
MB-GS/+	32.67	26.54	17.89	32.6	37.26	28.88	26.66	28.47	27.1062	42.3578	36.4574	24.4816		30.1144	1.89308
MB-GS/UAS-Rac1-CA	19.72	9.47	17.34	12.08	25.05	17.32	16.08	17.5	20.6404	25.8047	20.5673	22.052		18.6354	1.37992
MB-GS/UAS-Rac1-DN	34.65	35.91	37.91	34.56	56.02	34.95	32.38	43.52	26.6353	42.5918	48.1951	26.3102		37.8027	2.48309
Pro-I +
MB-GS/+	43.01	44.31	43.59	46.57	38.3	45.43	41.02	39.12	53.0909	44.4097	46.3415	40.6255		43.8181	1.14932
MB-GS/UAS-Rac1-CA	33.27	62.53	31	43.66	33.94	39.81	37.5	57.47	35.1185	41.9977	32.1254	26.7532		39.5979	3.08818
MB-GS/UAS-Rac1-DN	34.67	47.77	28.02	51.22	37.25	46.72	46.72	44.85	28.9706	53.9919	39.5699	41.9258		41.8065	2.40225
