# Supplementary material for: Genetic dissection of mutual interference between two consecutive learning tasks in Drosophila
Source: eLife. 2023 Mar 10;12:e83516. doi: 10.7554/eLife.83516 (PMC10030115; doi:10.7554/eLife.83516)
Supplement: Figure 3—figure supplement 1—source data 1. [file elife-83516-fig3-figsupp1-data1.xlsx]

## Sheet: S1D
Figure 3-figure supplement 1D
RU486 -											Mean	SEM
+/UAS-csw-RNAi-1	49.02	40.13	42.24	30.67	56.49	41.34	49.74	42.38			44.0012	2.73735
MB-GS/UAS-csw-RNAi-1	47.01	43.89	52.55	37.36	51.5	47.69	40.14	49.5			46.205	1.90105
RU486 +											Mean	SEM
+/UAS-csw-RNAi-1	51.55	40.52	38.79	41.26	50.64	36.76	44.43	55.75			44.9625	2.43159
MB-GS/UAS-csw-RNAi-1	32.5	32.08	48.07	32.84	36.32	44.11	37.19	28.7			36.4763	2.32246

## Sheet: S1E
Figure 3-figure supplement 1E
RU486 -											Mean	SEM
+/UAS-csw	41.3	51.19	32.3	56.71	56.34	47.65	43.59	37.3			45.7975	3.1117
MB-GS/UAS-csw	48.6	54.36	50.27	31.61	59.13	49.14	34.7	45.51			46.665	3.29665
RU486 +											Mean	SEM
+/UAS-csw	37.48	54.29	41.82	43.77	55.8	46.67	44.13	46.84			46.35	2.16906
MB-GS/UAS-csw	65.26	61.49	62.69	53.87	60.95	44.72	61.44	62.31			59.0913	2.35237

## Sheet: S1F
Figure 3-figure supplement 1F
RU486 -											Mean	SEM
Pro-I -	53.57	89.19	81.44	69.05	75.57	76.15	78.46	70.88			74.2888	3.69368
Pro-I +	52.08	48.84	56.91	49.6	49.15	61.28	46.07	58.02			52.7437	1.89492
RU486 +											Mean	SEM
Pro-I -	66.67	85.99	88.89	84.08	79.11	74.6	80.22	75			79.32	2.53739
Pro-I +	62.22	71.83	62.79	72.17	55.91	80.71	69.41	75.97			68.8762	2.86509

## Sheet: S1G
Figure 3-figure supplement 1G											Mean	SEM
5HT1B/+	51.38	32.47	30.24	46.07	39.55	40.66	51.47	48.3			42.5175	2.89302
5HT1B/UAS-csw	45.95	54.72	57.57	54.19	76.25	73.29	58.01	54.02			59.25	3.63723
VT30604/+	29.04	35.45	29.03	37.91	35.72	54.43	39.8	31.85			36.6538	2.89384
VT30604/UAS-csw	27.09	17.89	35.79	31.22	47.14	33.16	34.08	50.74			34.6388	3.7046
C739/+	26.51	39.38	35.09	36.18	48.28	52.01	50.83	53.64			42.74	3.47733
C739/UAS-csw	49.14	50.03	64.32	48.18	54.54	69.27	59.16	57.96			56.575	2.68089

## Sheet: S1H
Figure 3-figure supplement 1H
Pro-I -											Mean	SEM
Gal80ts/+;5-HT1B/+	64.05	59.91	68.45	53.27	54.87	57.41	65.42				60.4829	2.14851
Gal80ts/+;5-HT1B/UAS-csw-RNAi-1	60.5	49.97	71.22	60.58	68.64	41	59.72	67.5			59.8912	3.58309
Gal80ts/+; 5-HT1B/UAS-csw	54.68	60.3	57.79	59.1	65.65	56.96	58.05	63.47			59.5	1.26133
Pro-I +											Mean	SEM
Gal80ts/+;5-HT1B/+	52.68	50.15	37.49	36.28	50.16	51.29	48.63				46.6686	2.57192
Gal80ts/+;5-HT1B/UAS-csw-RNAi-1	45.02	43.32	35.72	55.46	46.98	52.07	50.83	39.74			46.1425	2.32791
Gal80ts/+; 5-HT1B/UAS-csw	53.54	39.13	40.55	28.17	51.98	32.95	43.65	55.86			43.2287	3.53307
Pro-I +/Pro-I - (%)											Mean	SEM
Gal80ts/+; 5-HT1B/+	68.1059	68.3251	84.7065	83.7089	78.3138	78.4011	76.9613				76.9318	2.4996
Gal80ts/+;5-HT1B/UAS-csw-RNAi-1	87.122	79.5277	72.5385	74.4132	77.5503	75.3037	75.8596	77.8714			77.5233	1.57258
Gal80ts/+; 5-HT1B/UAS-csw	51.5179	57.8476	67.7107	69.8536	73.8579	86.2023	84.3548	85.0876			72.054	4.57452

## Sheet: S1I
Figure 3-figure supplement 1I
Pro-I (Different context) -											Mean	SEM
+/UAS-csw-RNAi-1	52.73	65.05	58.87	53.76	56.64	62.38	59.57	51.87			57.6088	1.66937
MB-GS/UAS-csw-RNAi-1	45.38	58.33	37.34	63.98	61.69	61.27	49.58	58.26			54.4787	3.32214
Pro-I (Different context) +											Mean	SEM
+/UAS-csw-RNAi-1	38.56	49.53	59.49	45.39	51.56	64.51	63.39	59.41			53.98	3.2637
MB-GS/UAS-csw-RNAi-1	43.08	42.94	78.11	44.25	64.77	56.49	47.39	59.3			54.5412	4.45124
