# Supplementary material for: Genetic dissection of mutual interference between two consecutive learning tasks in Drosophila
Source: eLife. 2023 Mar 10;12:e83516. doi: 10.7554/eLife.83516 (PMC10030115; doi:10.7554/eLife.83516)
Supplement: Figure 3—source data 1. [file elife-83516-fig3-data1.xlsx]

## Sheet: 3A
Figure 3A
Pro-I -											Mean	SEM
MB-GS/+	53.3	53.76	56.69	59.5	55.03	66.49	65.31	66.76			59.605	2.04634
MB-GS/UAS-csw-RNAi-1	51.91	54.16	60.1	53.29	64.61	62.43	58.26	62.47			58.4038	1.69289
MB-GS/UAS-csw-RNAi-2	56.83	63.82	59.85	60.98	58.14	63.44	59.2	51.46			59.215	1.39872
Pro-I +											Mean	SEM
MB-GS/+	41.28	35.37	43.77	43.79	31.71	40.35	37.69	45.47			39.9288	1.66752
MB-GS/UAS-csw-RNAi-1	16.38	30.18	26.26	21.52	27.41	20.84	23.07	35.98			25.205	2.16258
MB-GS/UAS-csw-RNAi-2	27.22	25.27	32.51	22.65	40.54	20.85	30.37	43.18			30.3238	2.8606
Pro-I +/Pro-I - (%)											Mean	SEM
MB-GS/+	59.4934	65.7924	68.4899	71.1766	69.3782	67.0188	65.8595	68.1096			66.9148	1.23636
MB-GS/UAS-csw-RNAi-1	31.5546	39.1068	39.7341	39.5984	43.6938	43.9052	48.3112	55.688			42.699	2.52898
MB-GS/UAS-csw-RNAi-2	40.5169	39.8557	43.4641	45.9797	50.7435	53.3126	63.9029	67.659			50.6793	3.69528

## Sheet: 3B
Figure 3B
RU486 -											Mean	SEM
MB-GS/+	49.85	43.22	44.19	44.35	50.53	50.68	45.9	44.74			46.6825	1.10876
MB-GS/UAS-csw-RNAi-1	43.03	50.56	42.02	47.96	48.75	41.61	47.18	51.6			46.5888	1.37653
MB-GS/UAS-csw-RNAi-2	55.79	35.9	34.85	49.37	40.96	45.01	44.97	37.9			43.0938	2.53199
RU486 +											Mean	SEM
MB-GS/+	43.64	43.31	45.09	55.63	32.26	43.74	45	38.97			43.455	2.31019
MB-GS/UAS-csw-RNAi-1	31.04	40.94	14.65	30.11	31.39	36.7	34.46	27.96			30.9062	2.74091
MB-GS/UAS-csw-RNAi-2	19.59	26.6	19.05	25	23.45	40.81	24.88	30.93			26.2888	2.46939

## Sheet: 3C
Figure 3C
Pro-I -											Mean	SEM
MB-GS/+	59.55	64.43	55.66	63.51	56.1	39.09	56.39	63.54	58.17	48.59	56.503	2.45002
MB-GS/UAS-csw-RNAi-1	57.71	52.78	57.28	38.45	49.65	58.4	55.43	65.71	55.69	61.25	55.235	2.32243
Pro-I +											Mean	SEM
MB-GS/+	46.91	54.55	61.41	32.51	55.03	60.84	58.87	53.45	49.73	60.09	53.339	2.76911
MB-GS/UAS-csw-RNAi-1	28.96	51.14	41.97	39.99	37.68	36.98	38.71	30.53	51.83	47.08	40.487	2.45722

## Sheet: 3D
Figure 3D
Pro-I -											Mean	SEM
MB-GS/+	53.02	64.36	68.46	63.05	53.3	53.76	56.69	59.5			59.0175	2.0525
MB-GS/UAS-csw	63.77	60.42	74.88	57.99	60.24	59.68	53.47	50.71			60.145	2.5662
Pro-I +											Mean	SEM
MB-GS/+	46.92	49.7	45.45	52.87	41.28	35.37	43.77	43.79			44.8937	1.87739
MB-GS/UAS-csw	75.87	45.68	56.13	44.54	47	44.32	56.14	61.95			53.9537	3.90058

## Sheet: 3E
Figure 3E
RU486 -											Mean	SEM
MB-GS/+	47.55	55.37	46.34	44.59	50.68	45.9	44.74				47.8814	1.47216
MB-GS/UAS-csw	38.07	47.76	45.61	46.84	41.84	45.28	46.35				44.5357	1.28894
RU486 +											Mean	SEM
MB-GS/+	35.36	57.84	43.79	27.45	42.02	43.74	45	38.97			41.7713	3.07842
MB-GS/UAS-csw	53.29	61.67	57.32	56	62.5	56.9	64.29	49.94			57.7387	1.71941

## Sheet: 3F
Figure 3F
RU486 -											Mean	SEM
MB-GS/+	20	28.46	31.33	29.38	25.7	34.46	36.86	29.36	22.72	46.64	30.491	2.39873
MB-GS/UAS-csw-RNAi-1	23.76	19.28	28.61	25.3	30.8	27.49	43.55	43.04	45.32	33.37	32.052	2.87212
MB-GS/UAS-csw	17.5	19.14	14.58	22.32	23.56	37.77	38.76	27.85	42.09	35.12	27.869	3.12894
RU486 +											Mean	SEM
MB-GS/+	30.22	32.61	22.68	25.74	27.8	15.94	32.62	48.92	31.09	45.37	31.299	3.10286
MB-GS/UAS-csw-RNAi-1	24.94	26.11	24.69	28.97	19.75	20.17	29.48	41.56	46.94	26.42	28.903	2.77556
MB-GS/UAS-csw	18.72	22.1	17.22	31.04	27.09	27.37	39.66	43.83	38.56	36.53	30.212	2.92402

## Sheet: 3G
Figure 3G
Pro-I -											Mean	SEM
C739/+;Gal80ts/+	58.21	65.45	55.13	62.81	64.85	61.47	53.85	66.72			61.0613	1.71221
C739/+;Gal80ts/UAS-csw	53.73	60.43	49.19	50.43	52.48	54.8	49.01	52.99			52.8825	1.31053
Pro-I +											Mean	SEM
C739/+;Gal80ts/+	42.56	42.56	43.67	48.43	50.92	35.29	48.59	49.12			45.1425	1.81498
C739/+;Gal80ts/UAS-csw	39.12	45.1	44.09	42.77	47.09	43.97	39.3	48			43.68	1.14459

## Sheet: 3H
Figure 3H
Pro-I -											Mean	SEM
Gal80ts/+;5-HT1B/+	68.47	61.27	57.22	50.63	62.48	56.58	65.32	61.77			60.4675	1.96584
Gal80ts/+;5-HT1B/UAS-csw	70.21	67	70.71	68.38	61.11	70.98	64.84	63.34			67.0713	1.29921
Pro-I +											Mean	SEM
Gal80ts/+;5-HT1B/+	43.16	50.2	35.09	48.24	38.93	45.72	44.18	42.46			43.4975	1.71942
Gal80ts/+;5-HT1B/UAS-csw	65.12	58.58	64.36	68.22	59.25	50.39	66.72	63.45			62.0112	2.03726

## Sheet: 3I
Figure 3I
Pro-I -											Mean	SEM
Gal80ts/+;5-HT1B/+	62.49	54.72	53.09	59.1	63.74	63.12	56.84	56.72			58.7275	1.42771
Gal80ts/+;5-HT1B/UAS-csw-RNAi-1	63.14	68.9	52.46	64.54	50.84	58.79	61.86	45.22	63.43		58.7978	2.56192
Pro-I +											Mean	SEM
Gal80ts/+;5-HT1B/+	55.36	42.41	45.38	32.37	35.83	49.38	54.93	42.43			44.7613	2.93296
Gal80ts/+;5-HT1B/UAS-csw-RNAi-1	32.05	38.21	41.23	13	24.98	20.01	35.48	53.94	30.47		32.1522	4.03699
Pro-I +/Pro-I - (%)											Mean	SEM
Gal80ts/+;5-HT1B/+	60.9719	65.4788	74.7708	74.6481	76.7851	79.0206	87.0247	86.8528			75.6941	3.24091
Gal80ts/+;5-HT1B/UAS-csw-RNAi-1	28.7483	39.3588	47.6172	51.8285	51.8105	56.1926	60.2396	63.8829	78.2874		53.1073	4.75274
