# Supplementary material for: Genetic dissection of mutual interference between two consecutive learning tasks in Drosophila
Source: eLife. 2023 Mar 10;12:e83516. doi: 10.7554/eLife.83516 (PMC10030115; doi:10.7554/eLife.83516)
Supplement: Figure 4—figure supplement 1—source data 1. [file elife-83516-fig4-figsupp1-data1.xlsx]

## Sheet: S1B
Figure 4-figure supplement 1B
RU486 -											Mean	SEM
MB-GS/UAS-csw-RNAi-1	52.92	47.17	65.39	66.1	62.16	60.56	48.59				57.5557	2.98545
MB-GS/UAS-csw	59.64	48.96	55.34	57.41	59.99	65.6	59.82				58.1086	1.93209
RU486 +											Mean	SEM
MB-GS/UAS-csw-RNAi-1	56.11	57.68	45.3	63.84	43.01	60.99	51.43				54.0514	2.95497
MB-GS/UAS-csw	52.37	49.3	57.31	51.15	61.84	49.12	57.72				54.1157	1.84423

## Sheet: S1C
Figure 4-figure supplement 1C
RU486 -											Mean	SEM
MB-GS/UAS-csw-RNAi-1	21.59	21.52	26.18	32.09	22.69	39.01	19.48	30.8			26.67	2.38602
MB-GS/UAS-csw	43.15	23.07	34.05	26.92	21.08	30.95	15.35	25.29			27.4825	3.02787
RU486 +											Mean	SEM
MB-GS/UAS-csw-RNAi-1	22.91	17.97	23.95	24.55	34.73	18.28	27.36	12.7			22.8062	2.36524
MB-GS/UAS-csw	31.88	31.59	28.62	29.96	19.44	42.97	22.24	23.51			28.7763	2.59828

## Sheet: S1D
Figure 4-figure supplement 1D					MB-GS/UAS-Raf-GOF
RU486 -											Mean	SEM
0 h memory	54.47	63.07	61.7	52.41	66.02	61.5	58.58				59.6786	1.82762
3 h memory	32.19	24.41	26.65	21.08	40.54	36.3	26.51				29.6686	2.62327
RU486 +											Mean	SEM
0 h memory	53.57	67.37	64.78	62.55	58.76	74.24	69.3				64.3671	2.59264
3 h memory	49.34	46.89	39.35	37.69	44.81	59.08	43.16				45.76	2.69652

## Sheet: S1E
Figure 4-figure supplement 1E					MB-GS/UAS-sqh-RNAi
RU486 -											Mean	SEM
Pro-I -	74.97	54.99	52.97	43.91	55.09	57.59	49.05	56.16			55.5913	3.1808
Pro-I +	47.2	47.04	39.93	27.96	33.17	48.33	31.16	42.73			39.69	2.82601
RU486 +											Mean	SEM
Pro-I -	71.42	68.84	48.33	52.07	49.74	56.09	60.71	58.27			58.1837	3.00386
Pro-I +	59.95	42.39	38.21	40.71	39.67	43.14	45.44	37.6			43.3888	2.53855
