# Supplementary material for: Genetic dissection of mutual interference between two consecutive learning tasks in Drosophila
Source: eLife. 2023 Mar 10;12:e83516. doi: 10.7554/eLife.83516 (PMC10030115; doi:10.7554/eLife.83516)
Supplement: Figure 4—source data 1. [file elife-83516-fig4-data1.xlsx]

## Sheet: 4A
Figure 4A
U0126-											Mean	SEM
Pro-I -	79.45	76.33	80.18	77.53	75.76	77.74	73.08	77.39	65.5		75.8844	1.46959
Pro-I +	64.43	59.98	55.29	49.73	50.45	67.78	65.08	60.56	65.48		59.8644	2.22048
U0126+											Mean	SEM
Pro-I -	79.59	71.7	82.63	86.28	75.09	76.9	70.96	81.21	72.84		77.4667	1.771
Pro-I +	35.4	42.93	48.48	53.14	57	41.31	54.33	48.07	60.45		49.0122	2.69445

## Sheet: 4B
Figure 4B
RU486 -											Mean	SEM
MB-GS/+	49.85	36.64	44.19	44.35	50.53	50.68	45.9	44.74			45.86	1.64911
MB-GS/UAS-MAPK-RNAi	39.91	43.78	36.18	42.25	44.44	43.12	38.94	40.56			41.1475	0.984728
RU486 +											Mean	SEM
MB-GS/+	43.64	43.31	45.09	55.63	32.26	43.74	45	38.97			43.455	2.31019
MB-GS/UAS-MAPK-RNAi	16.23	24.13	20.7	25.31	23.4	26.24	27.73	19.04			22.8475	1.37751

## Sheet: 4C
Figure 4C	MB-GS/UAS-Raf-RNAi
RU486 -											Mean	SEM
Pro-I -	60.39	58.17	46.98	57.2	52.52	64.41	58.79	62.38			57.605	1.97077
Pro-I +	42.75	43.8	56.87	29.23	35.23	51.55	48.55	32.11			42.5112	3.44252
RU486 +											Mean	SEM
Pro-I -	48.9	52.14	54.03	62.08	61.43	53.41	58.71	59.48			56.2725	1.69669
Pro-I +	34.51	27.1	33.45	38.25	28.57	48.56	28.64	28.04			33.39	2.56692

## Sheet: 4D
Figure 4D	MB-GS/UAS-Raf-GOF
RU486 -											Mean	SEM
Pro-I -	66.82	69.12	73.79	60.51	68.58	71.15	68.35	73.22	59.96		67.9444	1.64365
Pro-I +	38.93	42.63	37.69	19.53	50.75	40.03	44.47	45.4	52.69	39.7	41.182	2.87572
RU486 +											Mean	SEM
Pro-I -	49.51	63.45	76.3	67.87	62.32	74.28	70.45	66.85	55.77		65.2	2.86145
Pro-I +	48.36	72.19	47.88	67.97	73.31	56.01	69.05	66	61.43	62.45	62.465	2.89207

## Sheet: 4E
Figure 4E
RU486 -											Mean	SEM
MB-GS/+	54.07	38.16	39.09	45.19	56.58	45.21	32.2	42.86			44.17	2.86937
MB-GS/UAS-GOF	43.32	43.28	61.1	52.48	48.22	52.69	49.84	32.82			47.9687	2.96321
MB-GS/UAS-GOF;UAS-csw	40.83	48.87	53.07	46.91	41.77	35.67	29.79	40.68			42.1988	2.62492
MB-GS/UAS-csw-RNAi-1	37.71	47.37	36.36	55.56	41.07	28.2	41.07	36.19			40.4412	2.89523
RU486 +											Mean	SEM
MB-GS/+	48.81	43.15	38.59	41.11	48.63	48.35	55.68	45.52	38.38		45.3578	1.88401
MB-GS/UAS-GOF	55.64	73.35	67.86	59.36	54.54	67.39	56.22	66.55	70.59	59.8	63.13	2.14801
MB-GS/UAS-GOF;UAS-csw	53.51	53.64	69.24	50.19	61.46	48.88	68.53	64.29	57.21	71.96	59.891	2.64961
MB-GS/UAS-csw-RNAi-1	30.21	27.76	36.93	35.29	26.72	38.31	28.97	26.42	21.14	38.37	31.012	1.86511
